# Supplementary material
Source: MDPI journal article supplement (https://www.mdpi.com/2571-6255/6/3/103)
Supplement: s1 [file s1]

## Supplementary Materials

**Table S1.** Characteristics of the studied sites with more of five points: Longitude, Latitude, Altitude, Precipitation and Time since last fire.

| <b>1-year</b>  | 58° 50' | 36° 43' | 2027 | 300 | 1                        |
|----------------|---------|---------|------|-----|--------------------------|
| <b>4-year</b>  | 58° 55' | 36° 37' | 1850 | 271 | 4                        |
| <b>10-year</b> | 58° 43' | 36° 33' | 2062 | 302 | 10                       |
| <b>20-year</b> | 58° 30' | 36° 40' | 2220 | 310 | 20                       |
| <b>Control</b> | 58° 28' | 36° 47' | 2723 | 327 | Without fire disturbance |

**Table S2.** A list of plant species presents in study sites and their functional trait values. Mean trait values were obtained in species level except for plant species marked by \* (for these plant species, mean trait values were obtained in genus level).

| Plant Species Name                                                      | Growth form | Plant Height (m) | C ( mg.g-1) | N ( mg.g-1) | Seed Mass (mg) | Life Span | SLA ( m <sup>2</sup> .kg-1) |
|-------------------------------------------------------------------------|-------------|------------------|-------------|-------------|----------------|-----------|-----------------------------|
| <i>Scandix stellata</i> Banks & Sol.                                    | Herb        | 0.49             | 449.3       | 24.79       | 13.38          | Annual    | 12.19                       |
| <i>Polygonum aviculare</i> L.                                           | Herb        | 0.43             | 439.61      | 31.91       | 2.83           | Annual    | 33.05                       |
| <i>Androsace maxima</i> L.                                              | Herb        | 0.014            | 436.07      | 21.12       | 1.15           | Annual    | 24.21                       |
| <i>Veronica hederifolia</i> L.                                          | Herb        | 0.29             | 454.22      | 22.67       | 3.98           | Annual    | 34.98                       |
| <i>Papaver dubium</i> L.                                                | Herb        | 0.36             | 458.96      | 41.84       | 0.17           | Annual    | 30.04                       |
| <i>Bromus tectorum</i> L.                                               | Grass       | 0.26             | 422.06      | 31.32       | 2.48           | Annual    | 29.56                       |
| <i>Ceratocephala falcate</i> (L.) Pers.                                 | Herb        | 0.53             | 442         | 26.05       | 5.31           | Annual    | 51.09                       |
| <i>Alyssum linifolium</i> * Stephan ex Willd.                           | Herb        | 0.23             | 421.17      | 29.4        | 1.21           | Annual    | 28.98                       |
| <i>Filago arvensis</i> L.                                               | Herb        |                  | 435         | 30          | 0.26           | Annual    | NA                          |
| <i>Ziziphora tenuior</i> L.                                             | Herb        | 0.18             | 451.86      | NA          | 0.4            | Annual    | 28.7                        |
| <i>Arctium lappa</i> L.                                                 | Herb        | 0.85             | 435.92      | 23.05       | 25.4           | Annual    | NA                          |
| <i>Cichorium intybus</i> L.                                             | Herb        | NA               | 435.92      | 35.5        | NA             | Annual    | NA                          |
| <i>Carex stenophylla</i>                                                | Grass       | 0.31             | 438.21      | 21.09       | NA             | Annual    | 19.95                       |
| <i>Erodium cicutarium</i> Wahlenb.                                      | Herb        | 0.43             | 451.51      | 19.7        | 2.3            | Annual    | 28.32                       |
| <i>Stipa arabica</i> Trin. & Rupr.                                      | Grass       | 0.56             | 450.49      | 18.16       | 3.43           | Annual    | 41.35                       |
| <i>Stellaria media</i> (L.) Vill.                                       | Herb        | NA               | 467.08      | 40.43       | 0.4            | Annual    | NA                          |
| <i>Vicia ervilia</i> (L.) Willd.                                        | Herb        | 0.4              | 472.97      | 33.77       | 40.5           | Annual    | 19.61                       |
| <i>Hypericum scabrum</i> L.                                             | Herb        | 0.37             | 445.6       | 22.1        | 0.158          | Annual    | 26.05                       |
| <i>Thlaspi perfoliatum</i> L.                                           | Herb        | 0.22             | 422.38      | 38.84       | 1.24           | Annual    | 29.61                       |
| <i>Taeniathrum caput-madusae</i> L.                                     | Grass       | 0.15             | 430.61      | 45.77       | 5.19           | Annual    | NA                          |
| <i>Serratula latifolia</i> Bioss.                                       | Herb        | 0.12             | 435.25      | 25.6        | 2.21           | Annual    | 17.08                       |
| <i>Silene swertiaefolia</i> Bioss.                                      | Herb        | 0.34             | 467.08      | 36.6        | 0.616          | Annual    | 26.35                       |
| <i>Holosteum glutinosum</i> (M.Bieb.)                                   | Herb        | 0.13             | 467.09      | 23.59       | 0.096          | Annual    | 37.03                       |
| <i>Achillea santolinoides</i> subsp. <i>wilhelmsii</i> (K.Koch) Greuter | Herb        | 0.29             | 410.61      | 25.83       | 0.43           | Annual    | 15.55                       |

|                                                   |         |      |        |       |        |           |        |
|---------------------------------------------------|---------|------|--------|-------|--------|-----------|--------|
| <i>Hymenocrater calycinus</i> * (Boiss.) Benth.   | Herb    | 0.5  | 451.86 | 23.37 | 25.4   | Perennial | 28.7   |
| <i>Perovskia abrotanoides</i> Kar.                | Herb    | 0.35 | 439.63 | 21.71 | 2.67   | Perennial | 23.27  |
| <i>Thalictrum sultanabadense</i> Stapf            | Herb    | 0.24 | 448    | 30.84 | 1.8    | Perennial | 27.04  |
| <i>Eremurus spectabilis</i> M. Bieb.              | Herb    | 0.53 | NA     | 23.66 | 6.68   | Perennial | 10.49  |
| <i>Noaea mucronata</i> (Forssk.)                  | Herb    | 0.6  | 385.31 | 25.02 | 4.2    | Perennial | 21.32  |
| <i>Verbascum cheiranthifolium</i> Boiss.          | Herb    | 0.84 | 489.01 | 20.8  | 0.11   | Perennial | 16.81  |
| <i>Onosma longilobum</i> Bunge                    | Herb    | 0.32 | 416.86 | 34.72 | NA     | Perennial | 26.3   |
| <i>Callipeltis cucullaris</i> (L.) DC.            | Herb    | NA   | NA     | NA    | 59.18  | Annual    | NA     |
| <i>Asperula glomerata</i> (M. Bieb.)              | Herb    | 0.28 | 477    | 27.17 | 2.38   | Annual    | 24.011 |
| <i>Valerianella tuberculata</i> Boiss.            | Herb    | 0.42 | 451.97 | 0.18  | 3.06   | Annual    | 38.075 |
| <i>Galium aparine</i> L.                          | Herb    | 0.39 | 434.04 | 0.72  | 9.92   | Annual    | 34.67  |
| <i>Bromus danthoniae</i> Trin.                    | Grass   | 0.37 | 426.05 | 0.37  | 4.5    | Annual    | 25.92  |
| <i>Ixiolirion tataricum</i> (Pall.)               | Herb    | 0.15 | NA     | NA    | NA     | Annual    | NA     |
| <i>Bunium persicum</i> (Boiss.)                   | Herb    | 0.5  | 448    | 0.42  | 1.4    | Perennial | 18.03  |
| <i>Phlomis cancellata</i> Bunge                   | Herb    | 0.97 | 451.86 | 0.75  | 5.9    | Perennial | 10.095 |
| <i>Alcea angulate</i> Freyn & Sint.               | Herb    | 1.55 | 442.8  | 0.12  | 9.98   | Perennial | 14.29  |
| <i>Eryngium bungei</i> Boiss.                     | Herb    | 0.25 | 448.08 | 0.25  | 4.62   | Perennial | 8.89   |
| <i>Artemisia kopetdaghensis</i> * Krasch., Popov. | shrub   | 0.88 | 456.44 | 0.88  | 9.96   | Perennial | 25.57  |
| <i>Cotoneaster nummularius</i> * Lindl.           | shrub   | 2.22 | 454.9  | 20.1  | 5.28   | Perennial | 11.89  |
| <i>Prunus microcarpa</i> C.M. Mey.                | shrub   | 0.27 | 431.56 | 33.83 | NA     | Perennial | 28.17  |
| <i>Acantholimon pterostegium</i> Bunge            | cushion | 0.2  | NA     | 25.11 | 29.88  | Perennial | 14.02  |
| <i>Lactuca orientalis</i> (Boiss.) Boiss.         | shrub   | 0.5  | 435.92 | 24.4  | 0.64   | Perennial | 30.61  |
| <i>Poa bulbosa</i> L.                             | Grass   | 0.23 | 438.21 | 13.42 | 0.45   | Perennial | 18.06  |
| <i>Elymus hispidus</i> (Opiz) Melderis            | Grass   | 0.51 | 439.07 | 18.41 | 327.37 | Perennial | 10.36  |
| <i>Lonicera nummulariifolia</i> * Jaub. & Spach   | shrub   | 2.44 | 476.61 | 20.38 | 12.33  | Perennial | 23.81  |
| <i>Ziziphora clinopodioides</i> Lam.              | shrub   | 0.88 | 451.81 | 23.37 | 0.32   | Perennial | 28.7   |

|                                                     |         |      |        |       |       |           |       |
|-----------------------------------------------------|---------|------|--------|-------|-------|-----------|-------|
| <i>Juniperus polycarpus</i> K. Koch                 | shrub   | 0.45 | 515.74 | 16.04 | 38.9  | Perennial | 4.2   |
| <i>Astragalus verus</i> Olivier                     | shrub   | 0.38 | 431.56 | 33.83 | 5.28  | Perennial | 28.17 |
| <i>Rosa beggeriana</i> Schrenk ex Fisch. & C.A.Mey. | shrub   | 2.1  | 454.9  | 18.67 | 14.23 | Perennial | 13.07 |
| <i>Acanthophyllum glandulosum</i> Bunge ex Boiss.   | cushion | 0.55 | 467.08 | 23.59 | 0.81  | Perennial | 29.53 |
| <i>Tragopogon gaudanicus</i> Boriss.                | Herb    | 0.24 | 420.55 | 21.08 | 12.45 | Annual    | 25.35 |
